# Supplementary material for: γ-Mangostin isolated from Garcinia mangostana L. suppresses inflammation and alleviates symptoms of osteoarthritis via modulating miR-124-3p/IL-6/NF-κB signaling
Source: publisher site journal article supplement (doi:10.18632/aging.103003), 2020-04-16
Supplement: Supplementary file [file aging-v12i8-103003-supplementary-material-SD2.pdf]

## SUPPLEMENTARY TABLES

**Supplementary Table 1. Murine primer sequence.**

| <b>miRNA</b>            | <b>Murine Primer Sequences</b> |
|-------------------------|--------------------------------|
| Mouse TNF- $\alpha$ -F  | TTCATGCACCACCATCAAGGACT        |
| Mouse TNF- $\alpha$ -R  | TGACCACTCTCCCTTTGCAGAACT       |
| Mouse NF- $\kappa$ B -F | GGCAGTGACGCGACG                |
| Mouse NF- $\kappa$ B -R | AGCGCCCCTCGCATTATAG            |
| Mouse IFN- $\gamma$ -F  | CGGCACAGTCATTGAAAGCCTA         |
| Mouse IFN- $\gamma$ -R  | GTTGCTGATGGCCTGATTGTC          |
| Mouse RPLP0 -F          | AGATTCGGGATATGCTGTTGGC         |
| Mouse RPLP0 -R          | TCGGGTCCTAGACCAGTGTTT          |
| Mouse IL-6 -F           | GAGGATACCACTCCCAACAGACC        |
| Mouse IL-6 -R           | AAGTGCATCATCGTTGTTCATACA       |

**Supplementary Table 2. miRNA primer details.**

| <b>miRNA</b>    | <b>QIAGEN catalogue number</b> |
|-----------------|--------------------------------|
| hsa-miR-24      | MS00006552                     |
| hsa-miR-98-5p   | MS00003367                     |
| hsa-miR-675     | MS00032109                     |
| hsa-miR-200a-3p | MS00003738                     |
| hsa-miR-124-3p  | MS00006622                     |
